# Supplementary material
Source: Springer Nature journal article supplement (https://www.springermedizin.de/resource/supplementary/13012_2010_251_MOESM1_ESM.pdf/9629558)
Supplement: MOESM1 [file 9629558]

## Develop

- Stakeholder consultation to identify innovations to target
- Conjoint analysis survey
- Mapping of shortlisted innovations against theory-based characteristics
- Explore attitudes towards the selected innovation
- Explore team culture
- Identify team characteristics
- Explore social networks
- Synthesise data collected using multilevel modelling

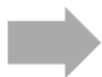

## IMplement

- Implementation strategies systematically developed based on synthesis of data collected during Development Phase
- Final selection of implementation strategies based on review of 'policy' cost effectiveness of different implementation strategies
- Supported dissemination from CRD
- Delivered to all relevant health professionals

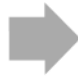

## Evaluate

- Pre – post change in attitudes, team culture, networks
- Interrupted time series
- Qualitative process evaluation
- Cost effectiveness of implementation
